# Supplementary material
Source: Springer Nature journal article supplement (https://www.springermedizin.de/resource/supplementary/12914_2012_240_MOESM1_ESM.pdf/9537114)

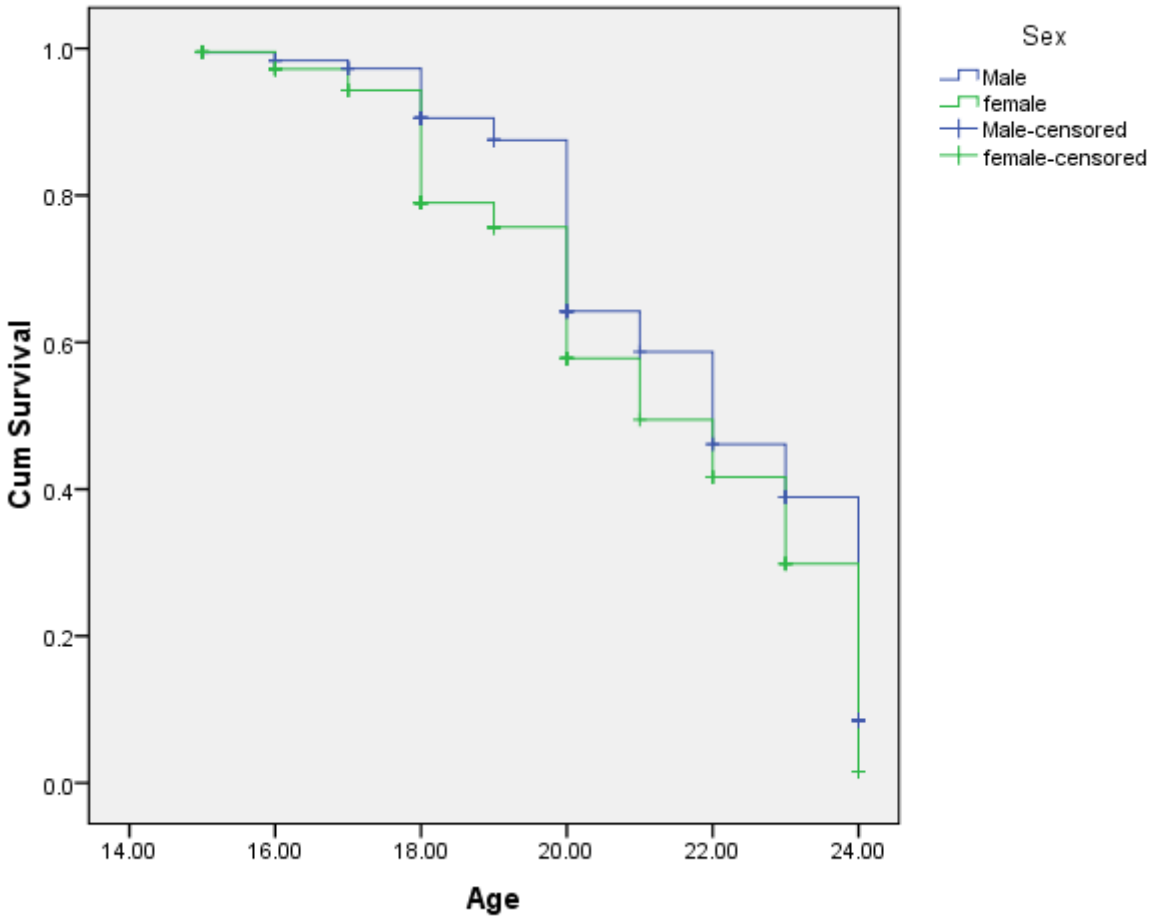

Supplement: MOESM1 [file 9537114]
